# Supplementary material
Source: PubMed Central journal article supplement (PMC3378145)
Supplement: emmm0001-0323-SD1.pdf [file emmm0001-0323-SD1.pdf]

## **SUPPLEMENTARY FIGURE LEGENDS**

### **Supplementary Figure 1. Methotrexate is selective for MSH2 deficiency**

A. MSH2 silencing sensitises HeLa cells to methotrexate. Survival curves are shown of HeLa cells stably infected with either a control shRNA or shRNA targeting MSH2 and then continuously exposed to methotrexate for 14 days. Protein lysates were immunoblotted and probed with MSH2 to show reduced expression of MSH2 upon shRNA silencing. B-tubulin was probed as a loading control.

B. MSH2 silencing sensitises MCF7 cells to methotrexate. Survival curves are shown of MCF7 cells carrying either a doxycycline-inducible control shRNA or an inducible shRNA targeting MSH2 and then continuously exposed to methotrexate for 14 days. Protein lysates were immunoblotted and probed with MSH2 to show reduced expression of MSH2 upon doxycycline-induced silencing. B-tubulin was probed as a loading control.

C. Methotrexate is not selective for MLH1 deficiency. Survival curves are shown of the MLH1 deficient HCT116 and MLH1 proficient HCT116+Chr3 cells continuously exposed to methotrexate for 14 days.

### **Supplementary Figure 2. Methotrexate treatment causes 8-OHdG accumulation upon MSH2 silencing**

A. Methotrexate induces oxidative DNA damage in MSH2 silenced cells. Hec59+Chr2 cells were transfected with either control or MSH2 siRNA and then treated with 10 nM methotrexate. After 72 hrs DNA was isolated and analysed for 8-OHdG content using a specific 8-OHdG ELISA assay. Assays were performed in triplicate. Error bars represent standard errors of the mean.

B. Methotrexate induces oxidative DNA damage in cells with inducible MSH2 silencing. MCF7 cells carrying either a doxycycline-inducible shCtrl or shMSH2, were treated with 10nM methotrexate. After 72 hrs DNA was isolated and analysed for 8-OHdG content using a specific 8-OHdG ELISA assay. Assays were performed in triplicate. Error bars represent standard errors of the mean.

C. Methotrexate causes an accumulation of 8-OHdG lesions over time in cells with inducible MSH2 silencing. MCF7 cells carrying either a doxycycline-inducible shCtrl or shMSH2, were treated with 10nM methotrexate and DNA analysed for 8-OHdG content over time, as before. A line graph showing relative levels of 8-OHdG content

over time is shown. Assays were performed in triplicate. Error bars represent standard errors of the mean.

D. MSH2 deficiency is associated with increased MYH expression. Hec59 and Hec59+Chr2 cells were treated with either DMSO or 100nM methotrexate. After 72 hr, protein lysates were immunoblotted and probed for MYH, OGG1, MTH1 and  $\beta$ -tubulin (loading control).

**Supplementary Figure 3. Treatment with selenomethionine or folic acid rescues the methotrexate selectivity with MSH2 deficiency**

A. Selenomethionine rescues methotrexate selectivity in cells with inducible MSH2 silencing. Survival curves are shown from MCF7 cells carrying either a doxycycline-inducible shCtrl or shMSH2 under continuous exposure to a range of concentrations of methotrexate +/- 1 $\mu$ M selenomethionine for 14 days. Error bars represent standard errors of the mean.

B. Selenomethionine reduces 8-OHdG accumulation in cells with inducible MSH2 silencing. MCF7 cells carrying either a doxycycline-inducible shCtrl or shMSH2 were treated as in (A) and DNA analysed for 8-OHdG content as before. Assays were performed in triplicate. Error bars represent standard errors of the mean.

C. Silencing of DHFR is selective for cells with inducible MSH2 silencing. Survival bar chart is shown of MCF7 cells carrying either a doxycycline-inducible shCtrl or shMSH2, transfected with siRNA oligonucleotides targeting DHFR. Error bars represent standard errors of the mean.

D. Folic acid rescues methotrexate selectivity in cells with inducible MSH2 silencing. Survival curves are shown of MCF7 cells carrying either a doxycycline-inducible shCtrl or shMSH2 under continuous exposure to a range of concentrations of methotrexate +/- 100  $\mu$ M Folic Acid for 14 days. Error bars represent standard errors of the mean.

**Supplementary Figure 4. *In vivo* analysis of Hec59 xenograft tumours**

A. Micrographs showing TUNEL staining in Hec59 xenograft tumours treated with methotrexate. **a**, Vehicle treated Hec59 tumour. **b**, Methotrexate treated Hec59 tumour

showing increased number of apoptotic cells. Arrows indicate TUNEL-positive cells. Original magnification A-D x40.

B. Photomicrographs of H&E stained sections of Hec59 xenograft tumours treated with methotrexate. **a**, Vehicle treated Hec59 tumour. **b**, Methotrexate treated Hec59 tumour showing increased levels of necrosis. Arrows indicate necrosis as defined by nuclear fragmentation, loss of cell borders, presence of cell debris, karyorexis and cystification. (Haematoxylin and eosin; original magnification A-D E x100)

### **Supplementary Table 1**

#### **List of small molecule inhibitors and corresponding Log<sub>2</sub> Surviving Fractions for Hec59 Vs. Hec59+Chr2 cells**

Hec59 and Hec59+Chr2 cells were screened using a library of 1120 compounds at an average compound concentration in media of 0.1 mM. The list represents the effect of each compound expressed as a log<sub>2</sub> surviving fraction, compared to DMSO-treated cells. To identify MSH2-selective effects, log<sub>2</sub> surviving fractions were compared from the two cell lines. Compounds highlighted in red are oxidative damage inducing agents.

# SUPPLEMENTARY FIGURE 1

## A

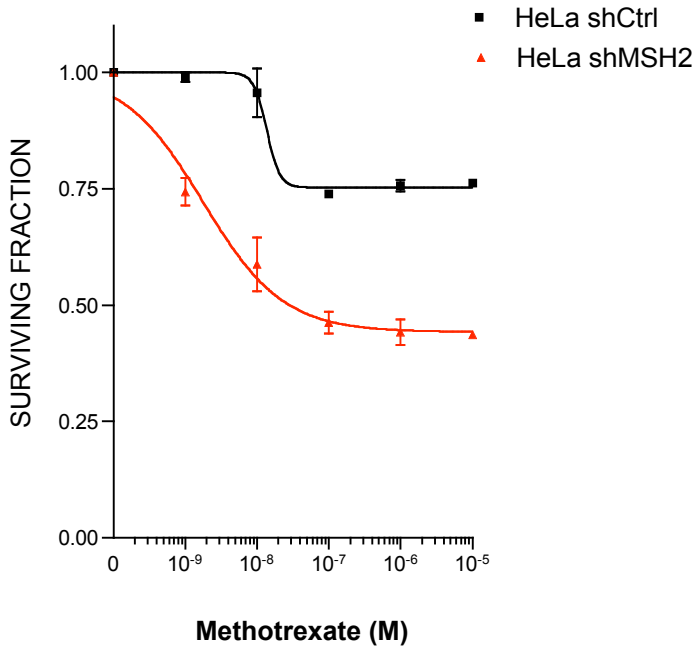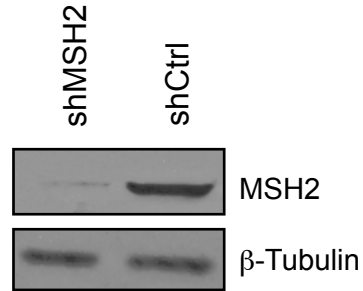

## B

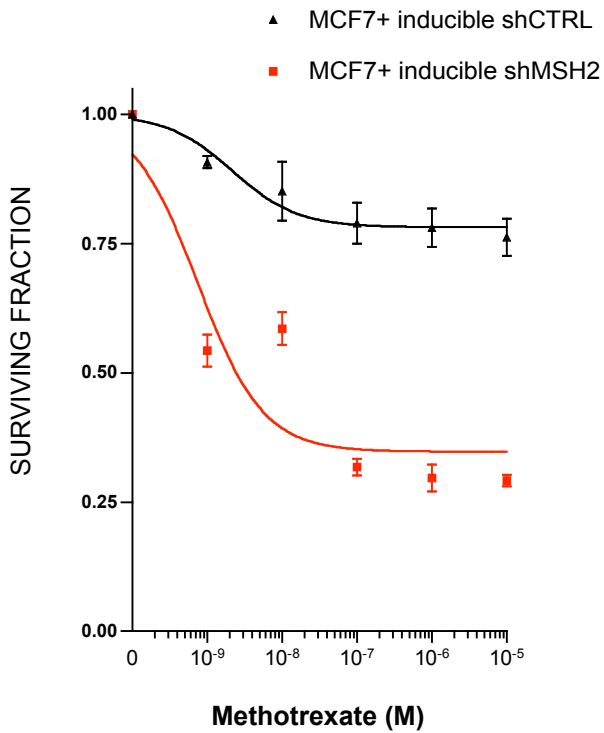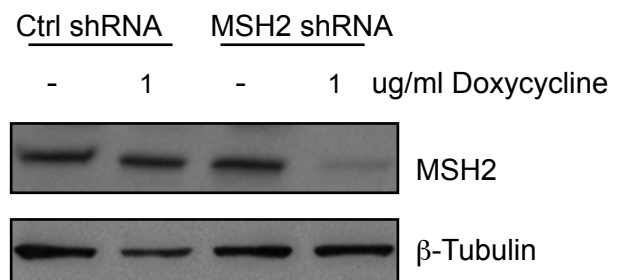



# SUPPLEMENTARY FIGURE 1

C

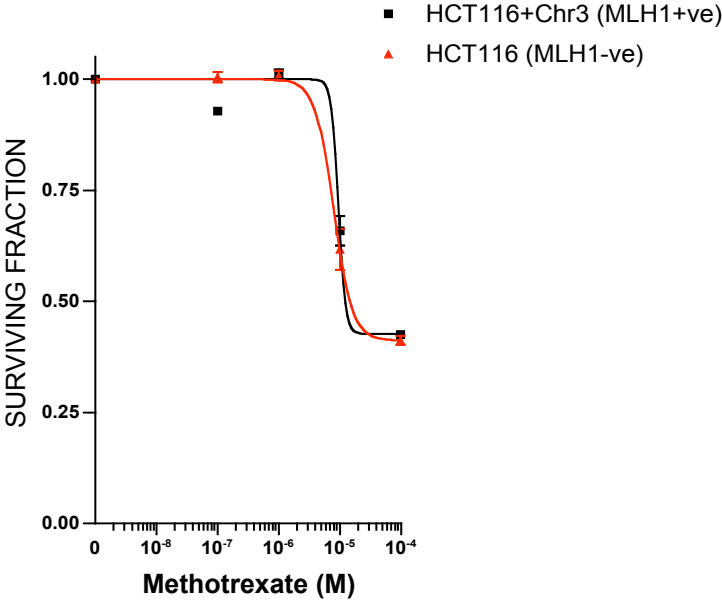

# SUPPLEMENTARY FIGURE 2

**A**

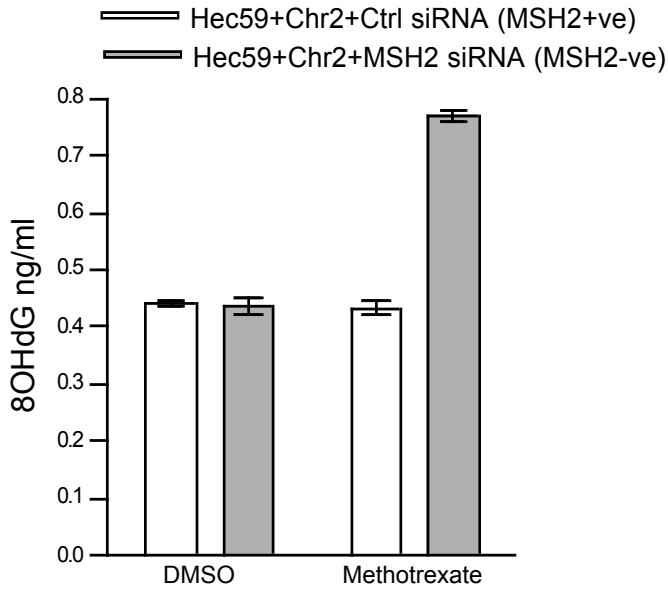

**B**

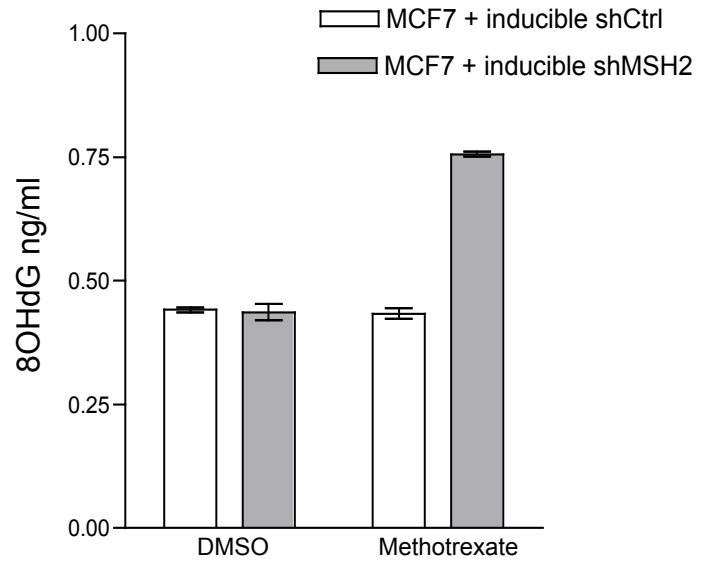

**C**

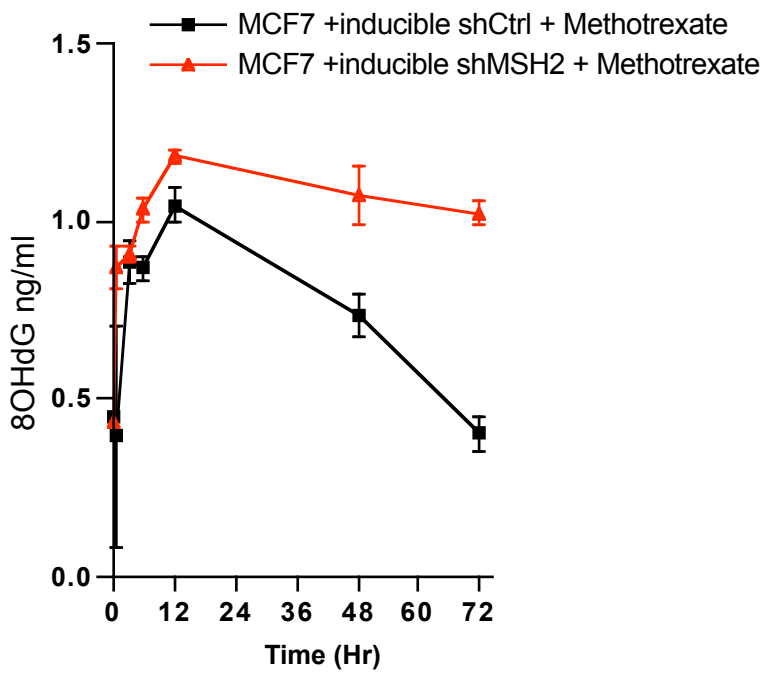

**D**

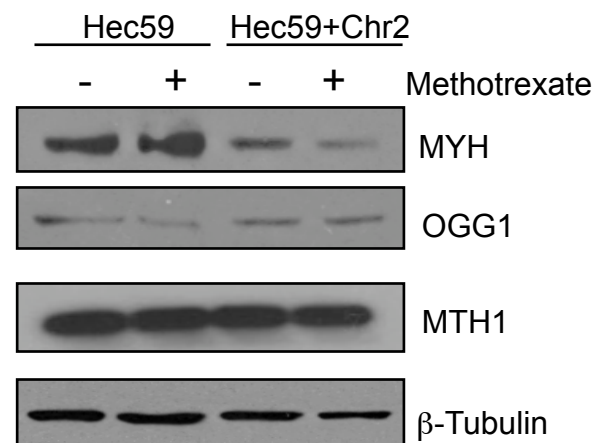

# SUPPLEMENTARY FIGURE 3

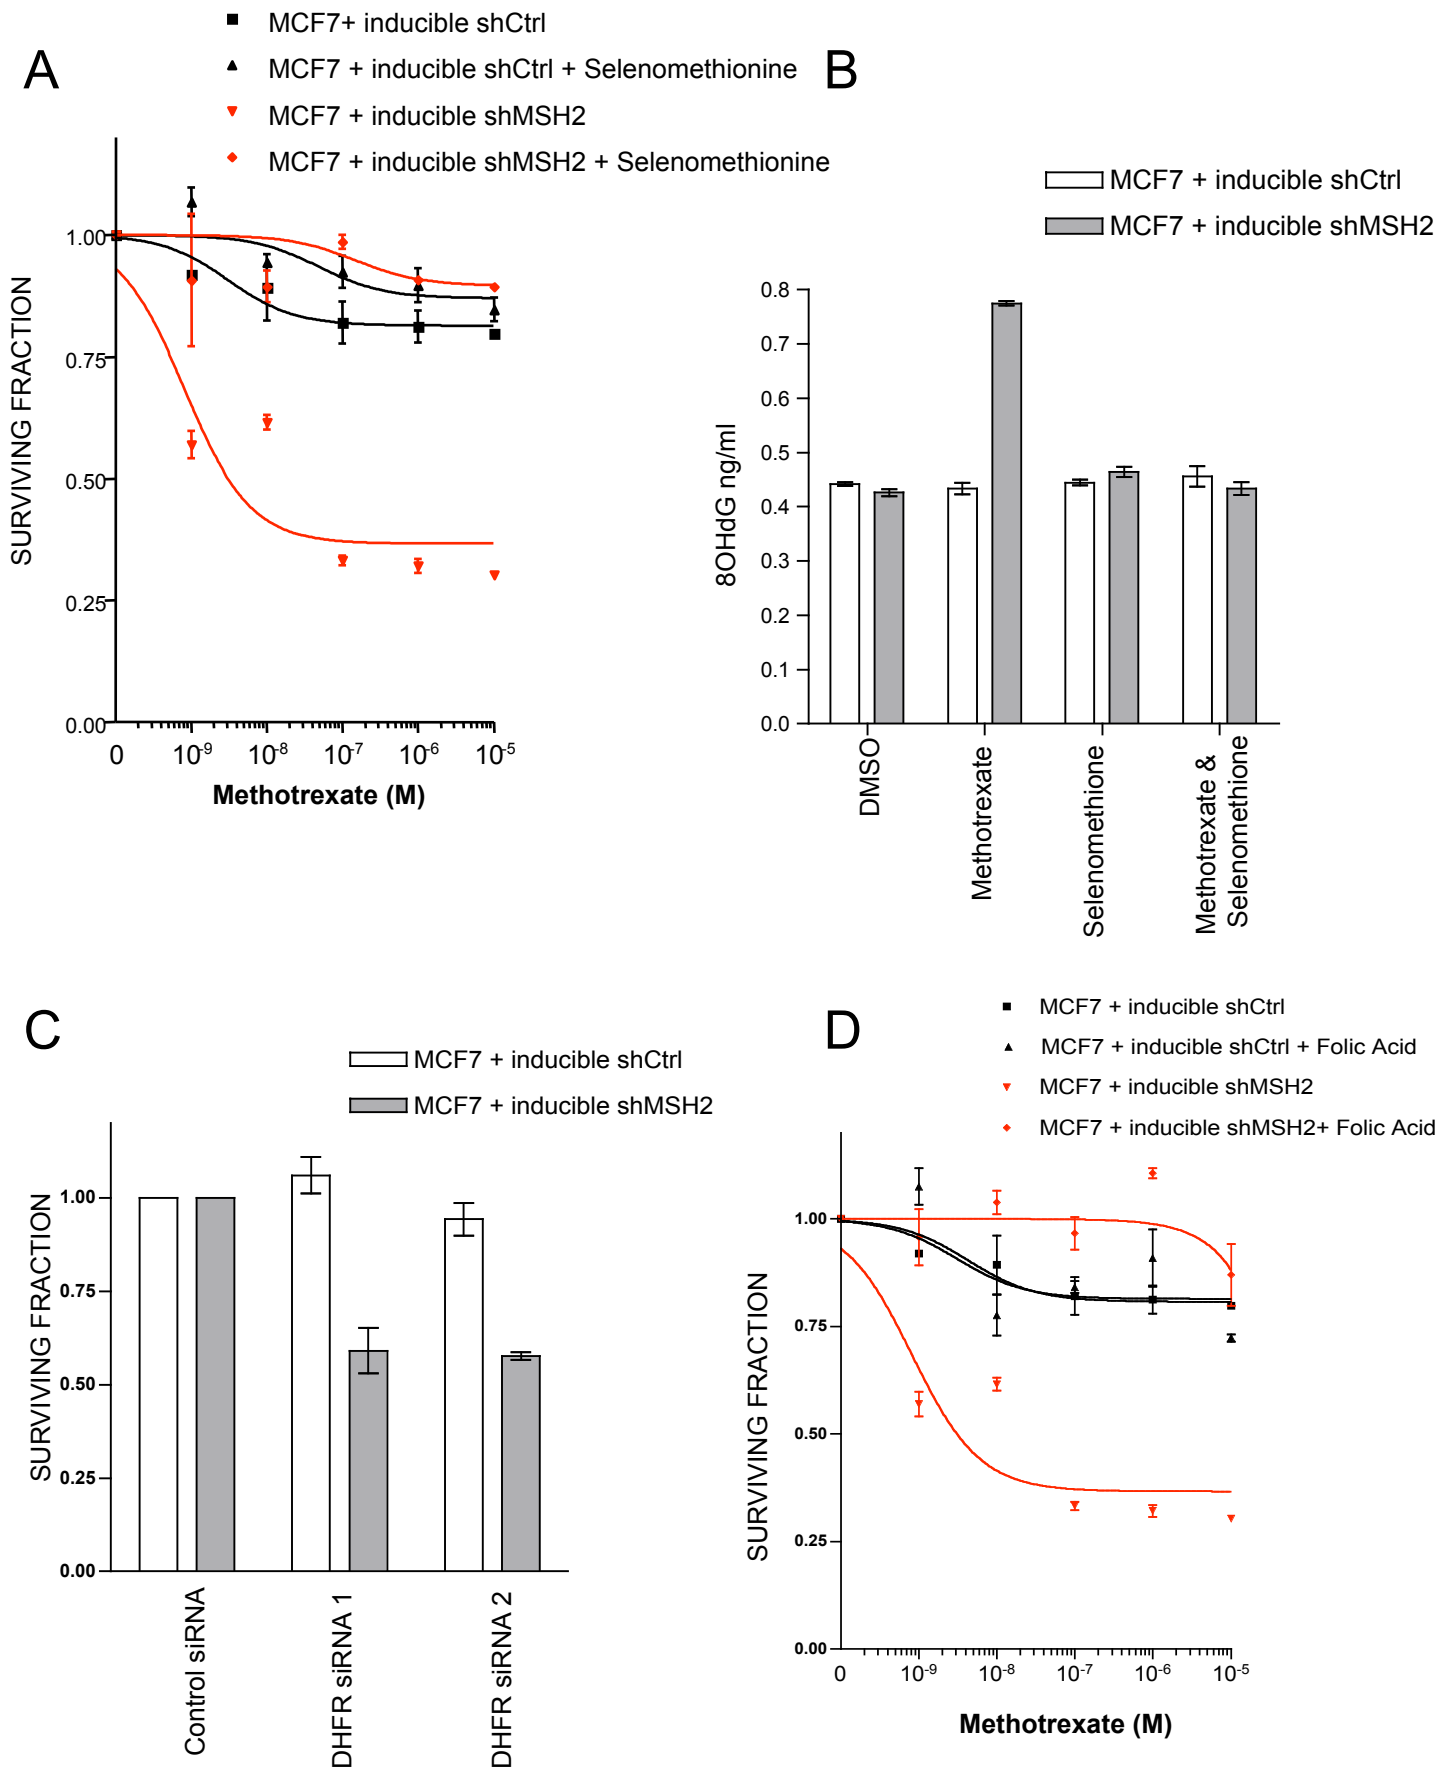

# SUPPLEMENTARY FIGURE 4

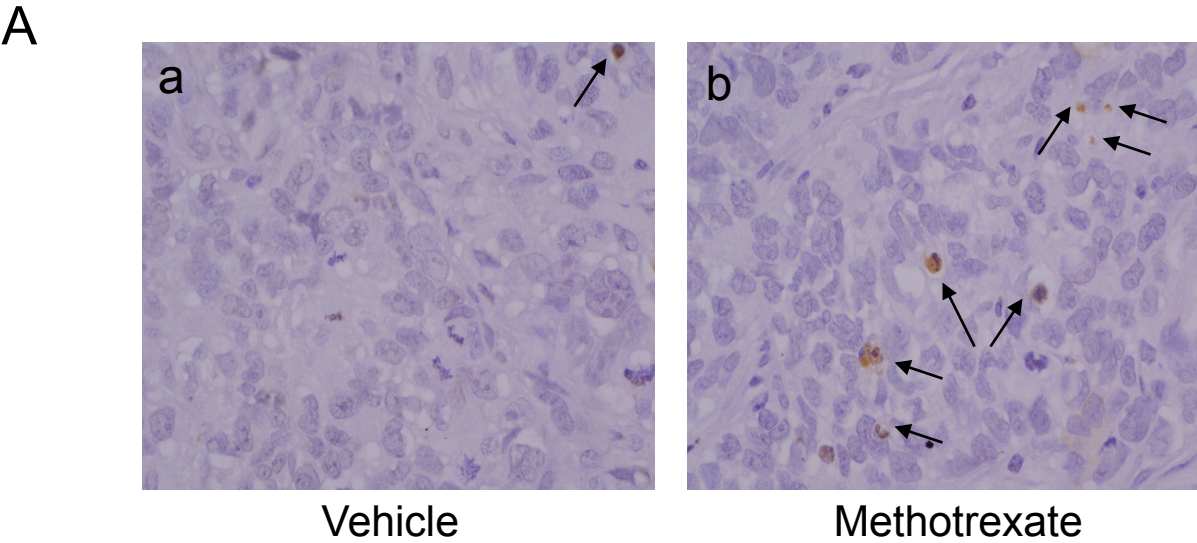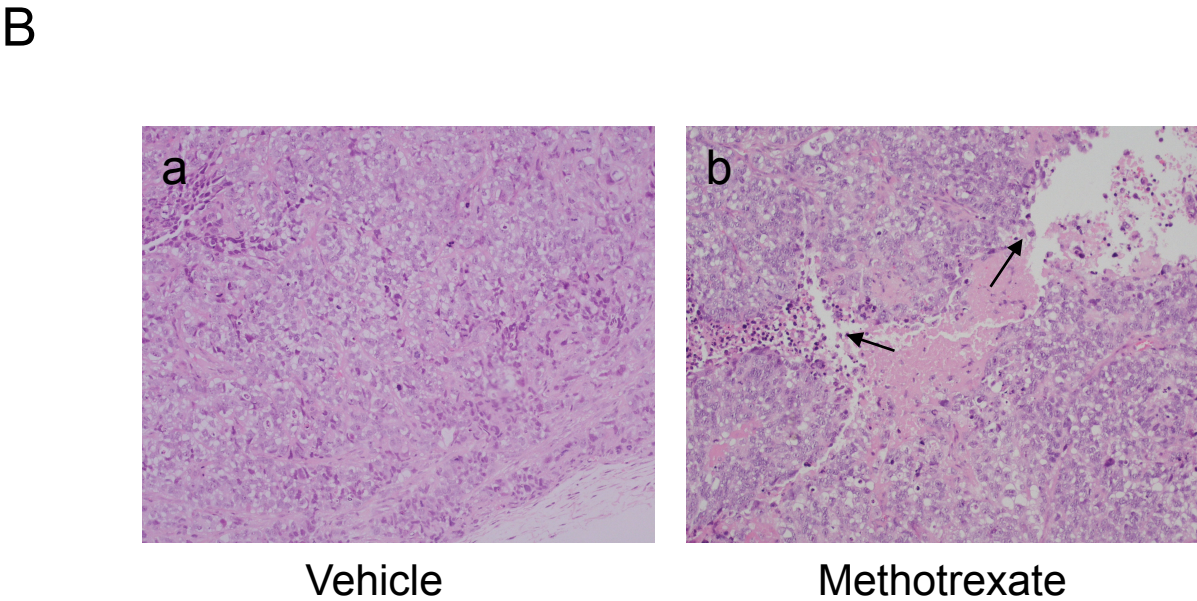

SUPPLEMENTARY TABLE 1.

| Log2 Surviving Fraction HEC59 vs. Hec59+chr2 | Chemical Name                                 | Known oxidising agent * |
|----------------------------------------------|-----------------------------------------------|-------------------------|
| <b>-24.41717148</b>                          | <b>Parthenolide</b>                           | *                       |
| -23.43154235                                 | Ciclopirox ethanolamine                       |                         |
| <b>-20.64664096</b>                          | <b>Daunorubicin hydrochloride</b>             | *                       |
| -20.62000211                                 | Thiostrepton                                  |                         |
| -18.90636384                                 | Nifuroxazide                                  |                         |
| -16.29396419                                 | Atovaquone                                    |                         |
| -14.93778693                                 | Pentamidine isethionate                       |                         |
| -13.58458439                                 | Mycophenolic acid                             |                         |
| <b>-8.69574725</b>                           | <b>Methotrexate</b>                           | *                       |
| -8.210040032                                 | Metixene hydrochloride                        |                         |
| -5.402513746                                 | Ibenguane sulfate                             |                         |
| <b>-5.033834608</b>                          | <b>Menadione</b>                              | *                       |
| -4.984552115                                 | Lovastatin                                    |                         |
| -4.776396368                                 | Artemisinin                                   |                         |
| -4.712837951                                 | Quercetine dihydrate                          |                         |
| -4.7004722                                   | Gentamicine sulfate                           |                         |
| -4.496057998                                 | Pimozide                                      |                         |
| -4.458822429                                 | Trifluoperazine dihydrochloride               |                         |
| -3.917113271                                 | Thiethylperazine malate                       |                         |
| -3.764620028                                 | Mefloquine hydrochloride                      |                         |
| -3.704662264                                 | Clofilium tosylate                            |                         |
| -3.693951445                                 | Sertaconazole nitrate                         |                         |
| -3.563887939                                 | Perphenazine                                  |                         |
| -3.550897946                                 | Budesonide                                    |                         |
|                                              | Quinacrine dihydrochloride dihydrate          |                         |
| -3.531210678                                 | GBR 12909 dihydrochloride                     |                         |
| -3.49343283                                  | Oxethazaine                                   |                         |
| -3.319551356                                 | Resveratrol                                   |                         |
| -3.188920424                                 | Pyrimethamine                                 |                         |
| -3.117869038                                 | Fluphenazine dihydrochloride                  |                         |
| -3.098604208                                 | Tenoxicam                                     |                         |
| -3.047932665                                 | Dicyclomine hydrochloride                     |                         |
| -2.868202202                                 | Tiabendazole                                  |                         |
| -2.826780301                                 | Meclozine dihydrochloride                     |                         |
| -2.805910302                                 | Clotrimazole                                  |                         |
| -2.777389753                                 | Atracurium besylate                           |                         |
| -2.733213843                                 | Isoflupredone acetate                         |                         |
| -2.693797698                                 | Biperiden hydrochloride                       |                         |
| -2.654329319                                 | Triflusal                                     |                         |
| -2.649005423                                 | Amethopterin (R,S)                            |                         |
| -2.582556408                                 | Metformin hydrochloride                       |                         |
| -2.56816676                                  | Miconazole                                    |                         |
| -2.55770369                                  | Fenofibrate                                   |                         |
| -2.462321699                                 | Phenindione                                   |                         |
| -2.440305676                                 | Allantoin                                     |                         |
| -2.398377304                                 | Amiloride hydrochloride dihydrate             |                         |
| -2.290024048                                 | Molsidomine                                   |                         |
| -2.286803871                                 | Flunarizine dihydrochloride                   |                         |
| -2.277356029                                 | Butoconazole nitrate                          |                         |
| -2.270447611                                 | Chloroquine diphosphate                       |                         |
| -2.265154474                                 | Dibucaine                                     |                         |
| -2.254837419                                 | Clorsulon                                     |                         |
| -2.231171329                                 | Tetramisole hydrochloride                     |                         |
| -2.224489536                                 | Metaproterenol sulfate, orciprenaline sulfate |                         |
| -2.216376085                                 | Amprolium hydrochloride                       |                         |
| -2.17828924                                  | Azaguanine-8                                  |                         |
| -2.174890595                                 | Prochlorperazine dimaleate                    |                         |
| -2.167715814                                 | Acetazolamide                                 |                         |
| -2.12949747                                  |                                               |                         |

-2.08443831  
  
-2.083303839  
-2.080124046  
-2.074627133  
-2.068451001  
-2.056667819  
-2.054183135  
-2.053231828  
-2.046468653  
-2.028092711  
-2.011832875  
-1.993593019  
-1.989273255  
-1.982071929  
-1.97172871  
-1.95432711  
-1.935232602  
-1.930884939  
-1.927076492  
-1.920370039  
-1.915054321  
-1.911651282  
-1.906367435  
-1.905101225  
-1.898639676  
-1.895181245  
-1.873897691  
-1.852208754  
-1.847172355  
-1.841066614  
-1.831764127  
-1.827115931  
-1.820840131  
-1.816067474  
-1.812565245  
-1.802778323  
-1.788434422  
-1.787475495  
-1.770376227  
-1.764589564  
-1.742640322  
-1.741627487  
-1.736690927  
-1.732910046  
-1.728399551  
-1.703994894  
-1.691384966  
-1.664626496  
-1.662342276  
-1.659381339  
-1.656536531  
-1.654097307  
-1.650030386  
-1.640230888  
-1.638782571  
-1.630427811  
-1.616110867  
-1.607899902  
-1.605374396  
-1.602115271  
-1.592079214

Pyrazinamide  
Isoquinoline, 6,7-dimethoxy-1-  
methyl-1,2,3,4-tetrahydro,  
hydrochloride  
Bufexamac  
Tamoxifen citrate  
Tiaprofenic acid  
Thioridazine hydrochloride  
Ceftazidime pentahydrate  
Cetirizine dihydrochloride  
Pirenperone  
Amyleine hydrochloride  
Heliotrine  
Pheniramine maleate  
Betahistine mesylate  
Cinnarizine  
Sulfathiazole  
Azathymine, 6  
Clemastine fumarate  
Mifepristone  
Hydrochlorothiazide  
Tolnaftate  
Omeprazole  
Vitamin K2  
Vigabatrin  
Levodopa  
Lidocaine hydrochloride  
Acebutolol hydrochloride  
Piperacetazine  
Antipyrine, 4-hydroxy  
Tobramycin  
Nortriptyline hydrochloride  
Flupentixol dihydrochloride cis-(Z)  
Benoxinate hydrochloride  
Phenacetin  
6-Furfurylaminopurine  
Sulfaguanidine  
Probenecid  
Norethynodrel  
Sulfacetamide sodic hydrate  
Ivermectin  
Dosulepin hydrochloride  
Iohexol  
Hydroflumethiazide  
Midecamycin  
Mesoridazine besylate  
Dyclonine hydrochloride  
Erythromycin  
Lynestrenol  
Triamterene  
Oxyphenbutazone  
Oxybutynin chloride  
Heptaminol hydrochloride  
Methiothepin maleate  
Sisomicin sulfate  
Panthenol (D)  
Trimetazidine dihydrochloride  
Trimethadione  
Benzonatate  
Cyproheptadine hydrochloride  
Cyclizine hydrochloride  
Ethacrynic acid  
Niclosamide

-1.579422403  
-1.577743581  
-1.576636794  
-1.564077941  
-1.521775862  
-1.510502334  
-1.505039858  
-1.497408148  
-1.485792348  
-1.476488793  
-1.46969031  
-1.469491599  
-1.46395643  
-1.447379422  
-1.444387541  
-1.440054814  
-1.422739596  
-1.417780714  
-1.402964999  
-1.395072312  
-1.392522664  
-1.389276097  
-1.389272191  
-1.388687351  
-1.386548868  
-1.385982574  
-1.384305505  
-1.38360672  
-1.379159482  
-1.375114127  
-1.370895495  
-1.364167705  
-1.36111088  
-1.357999741  
-1.355358228  
-1.353074035  
-1.34865355  
-1.343014217  
-1.340329269  
-1.3353826  
-1.334571678  
-1.333821901  
-1.331666004  
-1.329729335  
-1.328950065  
-1.325629539  
-1.315394165  
-1.306352468  
-1.305984836  
-1.295366017  
-1.287830189  
-1.287181153  
-1.278433355  
-1.277056342  
-1.277016373  
-1.272403281  
-1.267542149  
-1.265629911  
-1.26475095  
-1.26300236  
-1.262997423  
-1.262345425  
-1.261579993

Nystatine  
Acetohexamide  
Cimetidine  
Isoconazole  
Paclitaxel  
Cyclosporin A  
Estradiol-17 beta  
Naproxen  
Avermectin B1  
Astemizole  
Fendiline hydrochloride  
Oleandomycin phosphate  
Ticlopidine hydrochloride  
Kynurenine, 3-hydroxy (R,S)  
Dimenhydrinate  
Thioguanosine  
Sulindac  
Tomatine  
Diphenidol hydrochloride  
Econazole nitrate  
Epirizole  
Niflumic acid  
(S)-(-)-Cycloserine  
Bumetanide  
Moricizine hydrochloride  
Sulfadiazine  
Antipyrine  
Coralyne chloride hydrate  
Diprophylline  
Ethamivan  
Prednisolone  
Terconazole  
Tolazoline hydrochloride  
Methylprednisolone, 6-alpha  
Pergolide mesylate  
Chenodiol  
Trimethobenzamide hydrochloride  
Pregnenolone  
Glipizide  
Dapsone  
Minoxidil  
Glutethimide, para-amino  
Propafenone hydrochloride  
Flurandrenolide  
Austrocine  
Spironolactone  
Josamycin  
Naftifine hydrochloride  
Tetrahydrozoline hydrochloride  
Trichlorfon  
Idoxuridine  
Lysergol  
Clomipramine hydrochloride  
Flavoxate hydrochloride  
Pirenzepine dihydrochloride  
Disulfiram  
Vincamine  
Penbutolol sulfate  
Quinethazone  
Cortisone  
Isoxicam  
Amityptiline hydrochloride  
Diphemanil methylsulfate

-1.259339486  
-1.255206462  
-1.253289657  
-1.248653892  
-1.244404268  
-1.242860045  
-1.24058076  
-1.24026039  
-1.239708  
-1.236745469  
-1.236110955  
-1.2343844  
-1.230551147  
-1.229149501  
-1.22735915  
-1.224694548  
-1.224147428  
-1.223850245  
-1.222911099  
-1.216391308  
-1.214470652  
-1.213477963  
-1.212908217  
-1.211150153  
-1.210200115  
-1.20951308  
-1.209245682  
-1.208954048  
-1.202361773  
-1.201327745  
-1.200524076  
-1.200467281  
-1.199235809  
-1.199117511  
-1.199107113  
  
-1.197732224  
-1.194194942  
-1.192352285  
-1.1909652  
  
-1.189105031  
-1.188744949  
-1.188257176  
-1.187815275  
-1.187307864  
-1.174925961  
-1.173689089  
-1.171364252  
-1.169353409  
-1.165695578  
-1.162584842  
-1.161665335  
-1.159928963  
-1.159759608  
-1.155945358  
-1.155277406  
-1.153365295  
-1.151888543  
-1.149077292  
-1.145974731  
-1.145704767  
-1.143764378  
-1.143492862

Minaprine dihydrochloride  
Vancomycin hydrochloride  
DO 897/99  
Perhexiline maleate  
Isoxsuprine hydrochloride  
Labetalol hydrochloride  
Mebeverine hydrochloride  
Prednisone  
Foliosidine  
Cefotaxime sodium salt  
Piretanide  
Suxibuzone  
Myosmine  
Myricetin  
Moxisylyte hydrochloride  
Delsoline  
Lactobionic acid  
Lincomycin hydrochloride  
Dizocilpine maleate  
Diphenhydramine hydrochloride  
Imipenem  
Estriol  
Khellin  
Flunisolide  
Sulfinpyrazone  
Danazol  
Diethylcarbamazine citrate  
Trihexyphenidyl-D,L Hydrochloride  
Carbamazepine  
Chlorpheniramine maleate  
Troleandomycin  
Albendazole  
Anabasine  
Metolazone  
Doxepin hydrochloride  
Quinidine hydrochloride  
monohydrate  
Fillalbin  
Ethambutol dihydrochloride  
Bupropion hydrochloride  
Hexamethonium dibromide  
dihydrate  
Meticrane  
Gallamine triethiodide  
Dexamethasone acetate  
Chlorhexidine  
Hycanthon  
Ceforanide  
Graveoline  
(-)-Isoproterenol hydrochloride  
Retinoic acid  
Estropipate  
Muramic acid, N-acetyl  
Fluorouracil chloride  
Ginkgolide A  
Verapamil hydrochloride  
(cis-) Nanophine  
Chlorothiazide  
Naloxone hydrochloride  
Ampicillin trihydrate  
Mepenzolate bromide  
Disopyramide  
Metrizamide  
Selegiline hydrochloride



-1.142797598  
-1.142188252  
-1.139184155  
-1.139040831  
-1.138730952  
-1.131588029  
-1.13127027  
-1.130144817  
-1.130113216  
-1.12973776  
-1.129609672  
-1.128261188  
-1.128091739  
-1.127154337  
-1.124243976  
-1.121699919  
-1.119580171  
-1.117944292  
-1.116966161  
-1.115798252  
-1.112207208  
-1.112157413  
-1.111456091  
-1.111210152  
-1.102864642  
-1.100646531  
-1.100577581  
-1.097921721  
  
-1.094493111  
-1.094157525  
  
-1.091413565  
-1.083656261  
-1.083305852  
-1.083243195  
-1.082824327  
-1.079143894  
-1.07725329  
-1.076986774  
-1.075637814  
-1.071701166  
-1.070683936  
-1.065795187  
-1.062300437  
-1.059699823  
-1.05954393  
-1.059094839  
-1.058406301  
-1.054694037  
-1.053057751  
-1.0469037  
-1.045917948  
-1.0443561  
-1.044155636  
-1.042761573  
-1.040523054  
-1.03770629  
-1.035736879  
-1.035206944  
-1.032165199  
-1.032037314  
-1.031233962  
-1.02636999

Bepridil hydrochloride  
Trifluridine  
Fusaric acid  
Cefaclor  
Cyclobenzaprine hydrochloride  
Betonicine  
Alprenolol hydrochloride  
Enalapril maleate  
Lumicolchicine gamma  
Etomidate  
Triprolidine hydrochloride  
Lycorine hydrochloride  
Sulfaphenazole  
Naringin hydrate  
Piracetam  
Dihydrostreptomycin sulfate  
Naphazoline hydrochloride  
Telenzepine dihydrochloride  
Tridihexethyl chloride  
Guanethidine sulfate  
Karakoline  
Dropropizine (R,S)  
Melatonin  
Puromycin dihydrochloride  
Picotamide monohydrate  
Ethinisterone  
Lisinopril  
Fludrocortisone acetate  
Zimelidine dihydrochloride monohydrate  
Metanephrine hydrochloride DL  
Pantothenic acid calcium salt monohydrate  
Piperidolate hydrochloride  
Sulfamerazine  
Bromperidol  
Hydroxyzine dihydrochloride  
Epicatechin(-)  
Triamcinolone  
Parbendazole  
Delcorine  
Sulpiride  
Gelsemine  
Dydrogesterone  
Benfotiamine  
Dinoprost trometamol  
beta- Belladonnine dichloroethylate  
Doxylamine succinate  
Ricinine  
Cefixime  
Niridazole  
Napelline  
Diflunisal  
Pempidine tartrate  
Acetylsalicylsalicylic acid  
Dantrolene sodium salt  
Clonidine hydrochloride  
Spaglumic acid  
Procaine hydrochloride  
Ungerine nitrate  
Ifenprodil tartrate  
Picrotoxinin  
Citalopram Hydrobromide  
Pyrilamine maleate

-1.022541854  
-1.02005403  
-1.018702475  
-1.01664195  
-1.015055041  
-1.014631762  
-1.012797039  
-1.010154925  
-1.006501742  
-1.006477193  
-1.000974824  
  
0.002960779  
0.005340427  
0.013208149  
0.014002827  
0.014722337  
0.017640589  
0.020651934  
0.026147786  
0.032972508  
0.047619135  
0.055695868  
0.060286229  
0.060442823  
0.069348384  
0.069796812  
0.07189049  
0.072076173  
0.073231324  
0.077040478  
0.077674928  
0.078555963  
0.081593849  
0.08279049  
0.085654668  
0.087551968  
0.089292667  
0.094649214  
0.095154255  
0.095260216  
0.095702939  
0.098213921  
0.102105986  
0.109167132  
0.110895916  
0.111049871  
0.112607108  
0.112997405  
0.119306735  
0.122294752  
0.123264704  
0.126696774  
0.126718772  
0.127491404  
0.127974929  
0.128720473  
0.12879317  
0.12922669  
0.130604839  
0.132617349  
0.132838588  
0.133023689

Meclocycline sulfosalicylate  
Biotin  
Bacampicillin hydrochloride  
Edrophonium chloride  
Isotretinoin  
Norethindrone  
Carbimazole  
Mexiletine hydrochloride  
Deltaline  
Gabazine  
Metronidazole  
N-Acetyl-DL-homocysteine  
Thiolactone  
Bromopride  
Homatropine hydrobromide (R,S)  
Naltrexone hydrochloride dihydrate  
Hydroxytacrine maleate (R,S)  
Vitexin  
Sertraline  
Cefadroxil  
Thiamphenicol  
Sulmazole  
Methoxamine hydrochloride  
Mecamylamine hydrochloride  
Rifabutin  
Verteporfin  
Tolazamide  
Ciprofloxacin hydrochloride  
Ursolic acid  
Indomethacin  
Nalbuphine hydrochloride  
Cyanocobalamin  
Acenocoumarol  
Propylthiouracil  
(-)-Quinpirole hydrochloride  
Bromocryptine mesylate  
Glibenclamide  
Betazole hydrochloride  
Dipyridamole  
Captopril  
Chlorprothixene hydrochloride  
Nicergoline  
Repaglinide  
Succinylsulfathiazole  
Brompheniramine maleate  
Butirosin disulfate salt  
Glimepiride  
Azathioprine  
Gossypol  
Guanabenz acetate  
Testosterone propionate  
Oxaprozin  
Chlorogenic acid  
Canrenoic acid potassium salt  
Cefotiam hydrochloride  
Etanidazole  
Fluorometholone  
Mesalamine  
Neostigmine bromide  
Pepstatin A  
Corticosterone  
Lisuride (S)(-)  
Droperidol

0.134055274  
0.134577632  
0.136762285  
0.138047017  
0.138773652  
0.141407904  
0.141433532  
0.141652423  
0.142869217  
0.143449878  
0.143880876  
0.145479504  
0.145739536  
0.146520225  
0.148123591  
0.148217557  
0.149895148  
0.150060513  
0.151544873  
0.152187888  
0.155213054  
0.158007575  
0.158015971  
0.161080715  
0.161106085  
0.1613228  
0.162092946  
  
0.162285294  
0.162596909  
0.162889466  
  
0.164519391  
0.165169902  
0.166485656  
  
0.16764959  
0.167752815  
0.168725624  
0.169358501  
0.169497057  
0.169573013  
0.169927633  
0.17015195  
0.173063887  
0.173307592  
0.173459753  
0.173517005  
0.174102166  
0.174975568  
0.17549189  
0.175580825  
0.176514464  
0.176689564  
0.17790468  
0.178107119  
0.179286299  
0.180372232  
0.180696506  
0.181139142  
0.181695512  
0.183070896  
0.183079732  
0.18415374

Ambroxol hydrochloride  
Promazine hydrochloride  
Mephenytoin  
Tetracycline hydrochloride  
Beta-Escin  
Progesterone  
Cefotetan  
Leucomisine  
Fenoterol hydrobromide  
Nifedipine  
Hydrocortisone base  
Cyproterone acetate  
Spiperone  
Mefenamic acid  
Aspartic acid, N-acetyl (R,S)  
Loperamide hydrochloride  
Saquinavir mesylate  
(S)-propranolol hydrochloride  
Mianserine hydrochloride  
Betulinic acid  
Dehydrocholic acid  
Nomifensine maleate  
Clocortolone pivalate  
Acemetacin  
Antazoline hydrochloride  
Ascorbic acid  
Norcyclobenzaprine  
Adenosine 5'-monophosphate monohydrate  
Nicardipine hydrochloride  
Bupivacaine hydrochloride  
Amodiaquin dihydrochloride dihydrate  
Dicloxacillin sodium salt  
Prednicarbate  
(1-[4-Chlorophenyl]phenyl-methyl)-4-methylpiperazine  
Androsterone  
Carteolol hydrochloride  
Diperodon hydrochloride  
Praziquantel  
Deptropine citrate  
(+,-)-Synephrine  
Sulfadoxine  
Debrisoquin sulfate  
Carbarsone  
D-cycloserine  
Dorzolamide hydrochloride  
Carcinine  
Ritodrine hydrochloride  
Haloperidol  
Pilocarpine nitrate  
Nialamide  
Phensuximide  
Dequalinium dichloride  
Chicago sky blue 6B  
Adiphenine hydrochloride  
Carbetapentane citrate  
Morantel tartrate  
Brinzolamide  
Buflomedil hydrochloride  
Cyclopentolate hydrochloride  
Bisacodyl  
Acacetin

0.18425944  
0.184406044  
0.184497488  
0.184551883  
0.184900479  
0.185439296  
0.185952901  
0.186771679  
0.188223782  
0.188648821  
0.188973186  
  
0.189563263  
0.190007204  
0.190761958  
0.191025918  
0.19105309  
0.19209401  
0.19244287  
0.194046272  
0.194144961  
0.195099391  
  
0.195158018  
0.195474263  
0.19567188  
0.195957934  
0.196312262  
0.196547798  
0.198129341  
0.198157471  
0.198347433  
0.198911554  
0.199398156  
0.199479084  
0.200084167  
0.200198917  
0.200972116  
0.201288019  
0.201497118  
0.201797622  
0.203081323  
0.204184816  
0.205741348  
0.206969916  
0.207193068  
0.207261176  
0.207278003  
0.207539558  
0.207622395  
0.209867989  
0.210874968  
0.211205431  
0.211586556  
0.21290715  
0.215370447  
  
0.215784484  
0.216264813  
0.216345535  
0.216934676  
0.217012124  
0.217178604  
0.217482119

2-Chloropyrazine  
Sulfisoxazole  
Azacyclonol  
Famotidine  
Imidurea  
Dobutamine hydrochloride  
Methyl benzethonium chloride  
Lansoprazole  
Clebopride maleate  
Iopanoic acid  
Netilmicin sulfate  
Mebhydroline 1,5-  
naphthalenedisulfonate  
Minocycline hydrochloride  
Sulfabenzamide  
S(-)-Eticlopride hydrochloride  
Quinic acid  
Fipexide hydrochloride  
Zaprinast  
Halcinonide  
Practolol  
Benzethonium chloride  
(-)-Adenosine 3',5'-cyclic  
monophosphate  
Cefmetazole sodium salt  
Bethanechol chloride  
Betulin  
Ondansetron Hydrochloride  
Imipramine hydrochloride  
Trazodone hydrochloride  
Thiopropazine dimesylate  
N6-methyladenosine  
Methoxy-8-psoralen  
Cyclacillin  
Benzocaine  
Calciferol  
Meropenem  
Cefoperazone dihydrate  
Guanfacine hydrochloride  
alpha-Santonin  
Tremorine dihydrochloride  
Oxprenolol hydrochloride  
Homosalate  
Clofazimine  
Adamantamine fumarate  
Desipramine hydrochloride  
Procarbazine hydrochloride  
Loracarbef  
Clopamide  
Ethotoin  
Cephalosporanic acid, 7-amino  
Enoxacin  
Benfluorex hydrochloride  
Clozapine  
Dipyron  
Cefepime hydrochloride  
R(-) Apomorphine hydrochloride  
hemihydrate  
Scopolamin-N-oxide hydrobromide  
Methantheline bromide  
Clorgyline hydrochloride  
Amidopyrine  
Suloctidil  
Epiandrosterone

0.217501519  
0.217763092  
0.218451677  
0.218815528  
0.219105172  
0.219593631  
0.219933631  
0.22255434  
0.223274605  
0.224228176  
0.22440394  
0.226109498  
0.226434914  
0.226463221  
0.226677432  
0.226816559  
0.227834285  
0.228136129  
0.228814839  
0.230188244  
0.23053295  
0.231310234  
0.232288868  
0.232864601  
0.233195252  
0.233213677  
0.233601071  
0.233767185  
0.235040143  
0.235116153  
0.235469772  
0.235631955  
**0.235987762**  
0.236900135  
0.237921115  
0.238624584  
**0.239085156**  
0.240025834  
0.2401814  
0.240484578  
0.24060992  
0.240770674  
0.241229056  
**0.241379215**  
  
0.241995744  
0.243270793  
0.24342923  
0.243641263  
0.243908028  
0.244177692  
0.245398212  
0.245741226  
0.246200963  
0.246481038  
0.247021027  
0.247632328  
0.249413729  
  
0.250544007  
0.252645598  
0.252972878  
0.253395748  
0.253493703

Vinpocetine  
Methyldopa (L,-)  
Meprylcaine hydrochloride  
Helveticoside  
Dubinidine  
Pinacidil  
Benzylpenicillin sodium  
Furosemide  
Amoxapine  
Pimethixene maleate  
Ioxaglic acid  
Propoxycaine hydrochloride  
Hesperidin  
Azaperone  
Acyclovir  
Benzbromarone  
Condolphine  
Chlormezanone  
Oxantel pamoate  
Glycocholic acid  
Hemicholinium bromide  
Ramipril  
Bambuterol hydrochloride  
Cotinine (-)  
Arecoline hydrobromide  
Oxytetracycline dihydrate  
Probucol  
Cephalexin monohydrate  
Tropine  
Piperine  
Bisoprolol fumarate  
Clenbuterol hydrochloride  
**Amoxicillin**  
Triflupromazine hydrochloride  
Hesperetin  
Chlorpropamide  
**Tocopherol (R,S)**  
Streptomycin sulfate  
Cholecalciferol  
SR-95639A  
Methylethergometrine maleate  
Ticarcillin sodium  
Pivmecillinam hydrochloride  
**Mimosine**  
Phenylpropanolamine  
hydrochloride  
Cefalonium  
Kaempferol  
Zidovudine, AZT  
Pindolol  
Levopropoxyphene napsylate  
Amikacin hydrate  
Evoxine  
Fenbendazole  
Carisoprodol  
Dihydroergotamine tartrate  
Milrinone  
Procainamide hydrochloride  
Dextromethorphan hydrobromide  
monohydrate  
Ketotifen fumarate  
Domperidone maleate  
Naringenine  
Diphenylpyraline hydrochloride

\*

\*

\*

0.253735694  
0.254125243  
0.254255728  
0.254339488  
0.254592708  
0.255100319  
0.255642035  
0.256374318  
0.257125554  
0.257133235  
0.257339866  
0.258335217  
0.258472126  
0.258669195  
  
0.258855681  
0.258901769  
0.260325431  
0.261131267  
0.261654882  
0.262503153  
0.262532448  
0.264069882  
0.26444401  
0.264807764  
0.265621105  
0.265714797  
0.265829223  
0.266300235  
0.266441374  
0.266799623  
0.266842209  
0.267661062  
0.268591302  
0.268758683  
0.268936722  
0.270000684  
0.270154991  
0.270287209  
0.270343671  
0.271021601  
0.271844957  
0.272127726  
0.273465661  
0.273766543  
0.273971383  
0.274728043  
0.274810467  
0.275259096  
0.275274137  
0.276621895  
0.279145513  
0.279310575  
0.279461791  
0.28007038  
0.280149556  
0.28035196  
0.280620847  
0.282233682  
0.282765192  
0.284140796  
0.284292468  
0.28431032

Terbutaline hemisulfate  
Natamycin  
Chrysene-1,4-quinone  
Zuclopenthixol hydrochloride  
Neomycin sulfate  
Monensin sodium salt  
Zoxazolamine  
Chlortetracycline hydrochloride  
Baclofen (R,S)  
(-)-Eseroline fumarate salt  
Nitrarine dihydrochloride  
Nafronyl oxalate  
Dehydroisoandrosterone 3-acetate  
Chlorotrianisene  
3-alpha-Hydroxy-5-beta-androstan-17-one  
Proadifen hydrochloride  
Ciprofibrate  
Ronidazole  
Methapyrilene hydrochloride  
Halofantrine hydrochloride  
Propidium iodide  
Todalazine hydrochloride  
Diazoxide  
Methyldopate hydrochloride  
Buspirone hydrochloride  
Homochlorcyclizine dihydrochloride  
Tacrine hydrochloride hydrate  
Moroxidine hydrochloride  
Cephalothin sodium salt  
Alfuzosin hydrochloride  
Benzydamine hydrochloride  
Raloxifene hydrochloride  
Bezafibrate  
Tribenoside  
Adrenosterone  
Metergoline  
Idazoxan hydrochloride  
Sulconazole nitrate  
Betamethasone  
Ketanserin tartrate hydrate  
Epitiostanol  
(R)-Propranolol hydrochloride  
Isosorbide dinitrate  
Chlorthalidone  
Loxapine succinate  
Drofenine hydrochloride  
Trioxsalen  
Diltiazem hydrochloride  
Tyloxapol  
Sulfachloropyridazine  
Amphotericin B  
Esculetin  
Clindamycin hydrochloride  
Doxycycline hydrochloride  
Betaxolol hydrochloride  
Hexestrol  
Pramoxine hydrochloride  
Phentolamine hydrochloride  
Meptazinol hydrochloride  
Ethamsylate  
Flurbiprofen  
Hippeastrine hydrobromide

0.284845779  
0.285489421  
0.286186437  
0.287267567  
0.287305942  
0.287481926  
0.289575821  
0.289922121  
0.290700529  
0.291634617  
0.291648691  
0.291878234  
0.292595902  
0.292798811  
0.294281776  
0.294443219  
0.294894477  
0.294947616  
0.295225623  
0.295733281  
0.297947646  
0.29796241  
0.30114505  
0.301698689  
0.303492168  
0.304275203  
0.304289382  
0.304306787  
0.304626567  
0.304745742  
0.306541756  
0.307755443  
0.308107448  
0.308532949  
0.308687021  
0.309183939  
0.309386339  
0.309464209  
0.309573472  
0.310902365  
0.310918519  
0.311666872  
0.311754669  
0.311904465  
0.312605656  
0.313526901  
0.314102862  
0.314996453  
0.315215255  
0.315275522  
0.316237109  
0.316666695  
0.316678054  
0.317243021  
0.318010496  
0.32005045  
0.320759874  
0.321860502  
0.321932482  
0.322363302  
0.322732428  
0.322891516  
0.323420109

Antimycin A  
Griseofulvin  
Skimmianine  
Harmine hydrochloride  
Nilutamide  
(d,l)-Tetrahydroberberine  
Thyroxine (L)  
Deoxycorticosterone  
Nizatidine  
Zalcitabine  
Nalidixic acid sodium salt hydrate  
Propofol  
Finasteride  
Cloperastine hydrochloride  
Fursultiamine Hydrochloride  
Nitrocaramiphen hydrochloride  
Pipemidic acid  
(+) -Levobunolol hydrochloride  
Proparacaine hydrochloride  
Iodipamide  
Merbromin  
Cyclopenthiiazide  
Nimodipine  
Apramycin  
Viomycin sulfate  
Methocarbamol  
Flucytosine  
Amiodarone hydrochloride  
Kanamycin A sulfate  
Rolipram  
Ketorolac tromethamine  
Alfaxalone  
Oxybenzone  
Metaraminol bitartrate  
Etilefrine hydrochloride  
Felodipine  
S(-)-terguride hydrogen maleate  
Bretylum tosylate  
Primidone  
Gabexate mesilate  
Lanatoside C  
Rilmenidine hemifumarate  
Alverine citrate salt  
Benserazide hydrochloride  
Thioperamide maleate  
(+)-Isoproterenol (+)-bitartrate salt  
Aminopurine, 6-benzyl  
Fusidic acid sodium salt  
Pralidoxime chloride  
(±)-Nipecotic acid  
Alprostadil  
Maprotiline hydrochloride  
Bephenium hydroxynaphthoate  
Thonzonium bromide  
Megestrol acetate  
Paroxetine Hydrochloride  
S-(+)-ibuprofen  
Decamethonium bromide  
Ketoconazole  
Talampicillin hydrochloride  
Lasalocid sodium salt  
Azapropazone  
Pentetic acid

0.323802329  
0.324120343  
0.325978885  
0.328041911  
0.328937197  
0.329246073  
0.33114566  
0.332247945  
0.333450227  
0.333527548  
0.33364534  
0.333872675  
0.335206129  
0.335443151  
0.336256566  
0.337499503  
0.338017094  
0.338489156  
0.338502886  
0.339878629  
0.340591543  
0.340992579  
0.341576252  
0.341866  
0.342103908  
0.343305905  
0.343336683  
0.343980475  
0.345080579  
0.345692004  
0.345863472  
0.346312387  
0.347087621  
0.34738975  
0.34943934  
0.350007072  
0.351337868  
0.351540103  
0.358716771  
0.360984686  
0.361035841  
0.362661544  
0.362743112  
0.364044261  
0.366681878  
0.367323703  
0.367408612  
0.36760508  
0.367696476  
0.369034336  
0.370623179  
0.370725383  
0.372537643  
0.374017533  
0.37448315  
0.376118367  
0.376615551  
0.3767793  
0.378976008  
0.379972046  
0.380528982  
0.38116263  
0.381837711

Alfadolone acetate  
Reserpinic acid hydrochloride  
Ribavirin  
Scopoletin  
Sotalol hydrochloride  
Memantine Hydrochloride  
Xamoterol hemifumarate  
Cloxacillin sodium salt  
(-)-Levobunolol hydrochloride  
Fluticasone propionate  
Carbenoxolone disodium salt  
Crotamiton  
Ethinodiol diacetate  
Caffeic acid  
Ozagrel hydrochloride  
Cefuroxime sodium salt  
Novobiocin sodium salt  
Scopolamine hydrochloride  
Fenbufen  
Tolbutamide  
Dimaprit dihydrochloride  
Prilocaine hydrochloride  
Salbutamol  
Mefexamide hydrochloride  
Fenspiride hydrochloride  
Arbutin  
(+,-)-Octopamine hydrochloride  
Hydrastinine hydrochloride  
Orphenadrine hydrochloride  
Scoulerine  
Nimesulide  
Paromomycin sulfate  
Ajmaline  
Harpagoside  
Timolol maleate salt  
Pivampicillin  
Estrone  
Florfenicol  
Ajmalicine hydrochloride  
Ioversol  
Isometheptene mucate  
Gliquidone  
Aceclofenac  
Lymecycline  
Remoxipride Hydrochloride  
Mephenesin  
Trapidil  
Sanguinarine  
THIP Hydrochloride  
Iproniazide phosphate  
Enilconazole  
Ketoprofen  
Proglumide  
Tiapride hydrochloride  
Diloxanide furoate  
Acetaminophen  
Aztreonam  
Benzathine benzylpenicillin  
Berberine chloride  
Propantheline bromide  
Moxonidine  
Pargyline hydrochloride  
Pentolinium bitartrate



0.381890781  
0.382713779  
0.384181841  
0.384517094  
0.384934883  
0.386227491  
0.389648606  
0.391209581  
0.39327567  
0.393674249  
0.393881628  
0.396186522  
0.398485504  
0.399675578  
0.39989375  
0.400435766  
0.40196765  
0.40215942  
0.40317418  
0.404689812  
0.405336632  
0.405742586  
0.406213701  
0.40667666  
0.407162122  
0.407600851  
0.410193323  
0.411651387  
0.412095331  
0.412133147  
0.412735137  
0.412764726  
0.416302952  
0.421219152  
0.426727561  
0.428426217  
0.429219897  
0.430202125  
0.430334297  
0.432048204  
0.433183294  
0.434675496  
0.435406082  
0.439559022  
0.442426395  
0.444814158  
0.447659796  
0.448274835  
0.448626328  
0.449364414  
0.449869201  
0.45203027  
0.456325339  
0.459580502  
  
0.460532713  
0.464428313  
0.466162303  
0.468912077  
0.470499632  
0.470625436  
0.47117405  
0.472094714

Articaine hydrochloride  
Capsaicin  
Metoprolol-(+,-) (+)-tartrate salt  
Solasodine  
Indapamide  
Terazosin hydrochloride  
Aconitine  
Camptothecine (S,+)  
Letrozole  
Asiaticoside  
Pyrantel tartrate  
Glafenine hydrochloride  
Pirlindole mesylate  
6-Hydroxytryptinone  
Nomegestrol acetate  
Beta-sistosterol  
Benperidol  
Tropicamide  
Altretamine  
Tiletamine hydrochloride  
Oxalamine citrate salt  
Theobromine  
Pronethalol hydrochloride  
Iopamidol  
Monocrotaline  
Torsemide  
Alclometasone dipropionate  
Theophylline monohydrate  
Flumequine  
Hymecromone  
Iocetamic acid  
Gemfibrozil  
Bacitracin  
Tracazolate hydrochloride  
(-)-MK 801 hydrogen maleate  
Lorglumide sodium salt  
Sulfaquinoxaline sodium salt  
Ifosfamide  
Cefamandole sodium salt  
Lomefloxacin hydrochloride  
Thiamine hydrochloride  
Nadide  
Pentoxifylline  
Trimipramine maleate salt  
Risperidone  
Roxarsone  
Phthalylsulfathiazole  
Nitrendipine  
(S)-(-)-Atenolol  
Pizotifen malate  
Protriptyline hydrochloride  
Molindone hydrochloride  
Benzthiazide  
Clemizole hydrochloride  
Meclofenamic acid sodium salt  
monohydrate  
Oxolinic acid  
Nifenazone  
Gabapentin  
Nifurtimox  
Sulfamethoxazole  
Beclomethasone dipropionate  
Pancuronium bromide

0.47364486  
0.48165792  
0.489920348  
0.498706798  
0.500577604  
0.508113973  
0.510128794  
  
0.511814086  
0.513559743  
0.516751776  
0.524495767  
0.52461395  
0.526097325  
0.532636908  
0.535995291  
0.537578598  
0.540283246  
  
0.542696994  
0.543509696  
0.546271148  
0.546984428  
0.555533008  
0.555646792  
0.557315499  
0.557544967  
0.564606106  
0.567177524  
0.568745752  
0.569466303  
0.570277381  
0.572420726  
0.575029979  
  
0.575378341  
0.575636001  
0.577857312  
0.579059169  
0.583393406  
0.586404132  
0.586754384  
0.586811954  
0.587130101  
0.588274128  
0.593902917  
0.595957486  
0.597492078  
0.597503321  
0.600456196  
0.606763695  
0.606873  
0.607526135  
0.607940471  
0.608428753  
0.609742222  
0.610600955  
0.613608061  
0.623028875  
0.623393435  
0.62404869  
0.624568205  
0.624939966  
0.629843619

Methylatropine nitrate  
Ellipticine  
Urosiol  
Fluocinonide  
Harmine hydrochloride  
Mafenide hydrochloride  
Iopromide  
Metoclopramide  
monohydrochloride  
Metyrapone  
Tocainide hydrochloride  
Urapidil hydrochloride  
Liothyronine  
Streptozotocin  
Clomiphene citrate (Z,E)  
Chloramphenicol  
Phenoxybenzamine hydrochloride  
Aminocaproic acid  
Hydroquinine hydrobromide  
hydrate  
Dioxybenzone  
N-Acetyl-L-leucine  
Meglumine  
Palmatine chloride  
Fluvoxamine maleate  
Proguanil hydrochloride  
Bemegride  
Trimeprazine tartrate  
Proscillaridin A  
3-Acetamidocoumarin  
Denatonium benzoate  
Arcaine sulfate  
Strophantine octahydrate  
(R) -Naproxen sodium salt  
Tetrahydroxy-1,4-quinone  
monohydrate  
Alexidine dihydrochloride  
Alcuronium chloride  
Phenformin hydrochloride  
Iodixanol  
Clobetasol propionate  
Ornidazole  
Salmeterol  
Levamisole hydrochloride  
Guaifenesin  
Sulfamethazine sodium salt  
Hexylcaine hydrochloride  
Piroxicam  
Dipivefrin hydrochloride  
Epivincamine  
Tranlycypromine hydrochloride  
Isradipine  
Proxiphylline  
Laudanosine (R,S)  
Lobeline alpha (-) hydrochloride  
Roxithromycin  
Flutamide  
Etofilline  
Ebselen  
Levocabastine hydrochloride  
Vidarabine  
Trichlormethiazide  
Yohimbic acid monohydrate  
Nefopam hydrochloride

0.630292942  
0.633585636  
0.636689208  
0.639869141  
0.641241319  
0.642305048  
0.648954431  
0.652515089  
0.656235315  
0.656371486  
0.656571182  
0.657411398  
0.65910484  
0.659284811  
0.660487399  
0.66404573  
0.665408006  
0.667053816  
0.670431853  
0.672165478  
0.672843182  
0.676976114  
0.677501796  
0.681415627  
0.681806858  
0.682504161  
0.684111018  
0.688165551  
0.688556079  
0.691865711  
0.69264537  
0.696738081  
0.699138973  
0.700795666  
0.701142824  
0.70240219  
0.702858735  
0.703141891  
0.704419452  
0.71092557  
0.711131582  
0.711459207  
0.71168585  
0.712683915  
0.713188359  
0.715046943  
0.716101809  
0.716931154  
0.717799875  
0.72257789  
0.723561517  
0.725721849  
0.727022937  
0.727377023  
0.728938514  
0.729261575  
0.72941805  
0.729993746  
0.731029419  
0.731776603  
0.732639241  
0.733669377  
0.735212164

Pyrvinium pamoate  
2-Aminobenzenesulfonamide  
Esculin Hydrate  
Rolitetracycline  
Kawain  
Aminohippuric acid  
Tolfenamic acid  
Chelidone (+)  
Trimethoprim  
Cisapride  
Diclofenac sodium  
Procyclidine hydrochloride  
Xylometazoline hydrochloride  
Methylhydantoin-5-(D)  
Butacaine  
Bendroflumethiazide  
Bucladesine sodium salt  
Felbinac  
(-)-Cinchonidine  
Gibberellic acid  
Cefsulodin sodium salt  
Clofibrilic acid  
Thalidomide  
Piperacillin sodium salt  
Niacin  
Medrysone  
Isoniazid  
Sulfamonomethoxine  
Folinic acid calcium salt  
Mebendazole  
Lobelanidine hydrochloride  
Securinine  
Chloropyramine hydrochloride  
Hydralazine hydrochloride  
3-Acetylcoumarin  
Retrorsine  
Chlorphensin carbamate  
Trigonelline  
Clidinium bromide  
Phenelzine sulfate  
Oxymetazoline hydrochloride  
Digoxigenin  
Quipazine dimaleate salt  
Carbachol  
Etidronic acid, disodium salt  
Guanadrel sulfate  
Prazosin hydrochloride  
Pyrihydione  
Ethosuximide  
Atractyloside potassium salt  
Nabumetone  
Calycanthine  
Thiorphan  
Levonordefrin  
Sulfapyridine  
Ganciclovir  
Convolamine hydrochloride  
Catechin-(+,-) hydrate  
Nisoxetine hydrochloride  
Piribedil hydrochloride  
Propranolol hydrochloride  
Meclofenoxate hydrochloride  
Furazolidone

0.735686241  
0.735797204  
0.737126701  
0.73774511  
0.739220278  
0.745733307  
0.748853239  
0.749221755  
0.750157518  
0.751529068  
0.75243408  
0.752585864  
0.75438112  
0.755952421  
0.756486394  
0.763087447  
0.763191529  
0.76689221  
0.767704808  
0.769422276  
0.772425463  
0.773339647  
0.777706389  
0.779317341  
0.779623335  
0.780621178  
0.784872196  
0.786738268  
0.788594  
0.789580915  
0.789719864  
0.789842517  
0.793059578  
0.794261874  
0.794662206  
0.795070617  
0.796040345  
0.796280756  
0.797628475  
0.800057191  
0.800138265  
0.80047986  
0.800743413  
0.801354233  
0.805145037  
0.806552291  
0.810348989  
0.813749759  
0.815702744  
0.815705607  
0.815903235  
0.816129102  
0.821524208  
0.823330483  
0.823614706  
0.825008066  
0.826082615  
0.828166459  
0.828662788  
0.829120106  
0.830175879  
0.830840829  
0.830963728

Flecainide acetate  
Methimazole  
Cromolyn disodium salt  
Dimethadione  
Methazolamide  
Eburnamonine (-)  
Sulfamethizole  
Butamben  
Midodrine hydrochloride  
Nitrofurantoin  
Zomepirac sodium salt  
Chlorzoxazone  
Ribostamycin sulfate salt  
Methiazole  
Pentylentetrazole  
Ranitidine hydrochloride  
Nafcillin sodium salt monohydrate  
Indoprofen  
Isopropamide iodide  
Methacycline hydrochloride  
Bicuculline (+)  
Yohimbine hydrochloride  
Hydrocotarnine hydrobromide  
Dimethisoquin hydrochloride  
Flufenamic acid  
Flucloxacillin sodium  
Galanthamine hydrobromide  
Fenoprofen calcium salt dihydrate  
Isocorydine (+)  
Butylparaben  
Ofloxacin  
Piromidic acid  
Corynanthine hydrochloride  
Naftopidil dihydrochloride  
Zardaverine  
Norgestrel(-)-D  
Tetracaïne hydrochloride  
Cefoxitin sodium salt  
Gramine  
Demeclocycline hydrochloride  
Azlocillin sodium salt  
Hydrastine hydrochloride  
Ipratropium bromide  
Phenethicillin potassium salt  
Fluspirilen  
Etodolac  
Harmol hydrochloride monohydrate  
Bergenin monohydrate  
Ampyrone  
Norfloxacin  
Cantharidin  
Sparteine (-)  
Althiazide  
Solanine alpha  
Tomatidine  
Riboflavine  
Fosfosal  
Cefazolin sodium salt  
Sulfamethoxy pyridazine  
Digitoxigenin  
Isocarboxazid  
Digoxin  
Leflunomide

0.832923001  
0.834416541  
0.837753705  
0.840674372  
0.841495306  
0.841729554  
0.841932389  
0.842599316  
0.8430944  
0.844616708  
0.848039054  
0.848482172  
0.848869514  
0.849535106  
0.854277495  
0.854837962  
0.855401359  
0.856404213  
0.856712055  
0.857380891  
0.857478232  
0.859438028  
0.860446686  
0.861289772  
0.862666413  
0.863800188  
0.864827514  
0.865550825  
0.868732112  
0.870950334  
0.871637596  
0.871942986  
0.880592194  
0.881430071  
0.882096299  
0.88449262  
0.885106752  
  
0.885523815  
0.887861325  
0.887861584  
0.888155103  
0.891496455  
0.892353058  
0.893601893  
0.895610831  
0.895767029  
0.897089117  
0.899096058  
0.900144361  
0.900442394  
0.901210565  
0.901845422  
0.903404019  
  
0.903873657  
  
0.906155392  
0.906358508  
0.906625267  
0.908303688  
0.91218425  
0.912853601  
0.912933599

Amiprilose hydrochloride  
Trimethylcolchicinic acid  
Flunixin meglumine  
Flumethasone  
Dichlorphenamide  
Demecarium bromide  
Boldine  
Atropine sulfate monohydrate  
Isoetharine mesylate salt  
Chrysin  
Carbinoxamine maleate salt  
Pridinol methanesulfonate salt  
Sulfadimethoxine  
Noscapine  
Stachydrine hydrochloride  
Metampicillin sodium salt  
Dicumarol  
Tinidazole  
Sulfameter  
Moxalactam disodium salt  
Rauwolscine hydrochloride  
Lithocholic acid  
Methacholine chloride  
Pipenzolate bromide  
Amrinone  
Sulfanilamide  
Ethinylestradiol 3-methyl ether  
Eucatropine hydrochloride  
Ethoxyquin  
Cinchonine  
Harmalol hydrochloride dihydrate  
Mometasone furoate  
Reserpine  
Isopyrin hydrochloride  
Tranexamic acid  
Piperlongumine  
Rescinnamin  
Tubocurarine chloride pentahydrate  
(+)  
Glycopyrrolate  
Folic acid  
Furaltadone hydrochloride  
Nadolol  
Phenazopyridine hydrochloride  
Suprofen  
Mevalonic-D, L acid lactone  
Methoxy-6-harmalan  
Pseudopelletierine hydrochloride  
Xylazine  
Dilazep dihydrochloride  
Promethazine hydrochloride  
Cinoxacin  
Salsolinol hydrobromide  
Hyoscyamine (L)  
Cephaeline dihydrochloride  
heptahydrate  
Tiratricol, 3,3',5-triiodothyroacetic  
acid  
Cytisine (-)  
Doxazosin mesylate  
Papaverine hydrochloride  
Protoveratrine A  
Spectinomycin dihydrochloride  
Diethylstilbestrol

0.914938313  
0.9152024  
0.915219501  
0.917394922  
0.91787198  
0.920677026  
0.920967688  
0.924978368  
0.925072373  
0.928511392  
0.929522112  
0.929795653  
  
0.932113955  
0.932484114  
0.942111304  
0.94847642  
0.950392657  
0.950591411  
0.953560699  
0.954684873  
0.956211116  
0.96111205  
0.961183942  
0.96479198  
0.965899009  
0.966534061  
0.966570859  
  
0.966612767  
0.966717651  
0.966830305  
0.966919456  
0.967393852  
0.968368698  
0.968598158  
0.970904123  
0.972175344  
0.976782504  
0.979901383  
0.980028091  
0.980871839  
0.98325058  
**0.983295467**  
0.986521683  
0.98822821  
0.988893883  
0.991130553  
**0.993256728**  
0.994019699  
0.994570522  
1.0100065  
1.053728962  
1.258737761  
1.306409549  
1.419656244  
1.47780539  
1.530220826  
1.829200271  
2.092602445  
2.346496979  
2.605469362  
4.895988884  
6.333186562

Methotrimeprazine maleate salt  
Hecogenin  
Seneciphylline  
Pyridoxine hydrochloride  
Ethopropazine hydrochloride  
Mephentermine hemisulfate  
Equilin  
Dacarbazine  
Deferoxamine mesylate  
Cycloheximide  
Diflorasone Diacetate  
Racecadotril  
Eserine sulfate, physostigmine sulfate  
Primaquine diphosphate  
Strophanthidin  
L(-)-vesamicol hydrochloride  
Azacytidine-5  
Syrosingopine  
Ergocryptine-alpha  
Conessine  
Acetopromazine maleate salt  
Clioquinol  
Spiramycin  
Aminophylline  
Rimexolone  
Methylhydantoin-5-(L)  
Harmaline hydrochloride dihydrate  
Canavanine sulfate monohydrate (L,+)  
Ethaverine hydrochloride  
Anisomycin  
Dihydroergotoxine mesylate  
Dienestrol  
Dihydroergocristine mesylate  
Serotonin hydrochloride  
Mitoxantrone dihydrochloride  
Colchicine  
Emetine dihydrochloride  
Monobenzene  
Lidoflazine  
Chlorambucil  
Simvastatin  
**Podophyllotoxin**  
Tolmetin sodium salt dihydrate  
Luteolin  
Terfenadine  
Riluzole hydrochloride  
**Doxorubicin hydrochloride**  
Famprofazone  
Fluvastatin sodium salt  
Etoposide  
Dirithromycin  
Benzamil hydrochloride  
Chlorpromazine hydrochloride  
Gliclazide  
Tetrandrine  
Nocodazole  
Apigenin  
Trolox  
Rifampicin  
(R)-(+)-Atenolol  
Colistin sulfate  
Thiocolchicoside

\*

\*

|             |                            |
|-------------|----------------------------|
| 9.852578736 | Methionine sulfoximine (L) |
| 9.900139189 | Prenylamine lactate        |
| 13.83040007 | Etifenin                   |
| 14.44399952 | Nitrofuraf                 |
| 16.78663486 | Fluoxetine hydrochloride   |
| 17.32933594 | Hexetidine                 |
| 18.07917081 | Ethionamide                |
| 21.09108532 | Sulfasalazine              |
