# Supplementary material
Source: PubMed Central journal article supplement (PMC3378145)

# SUPPLEMENTARY FIGURE 1

## A

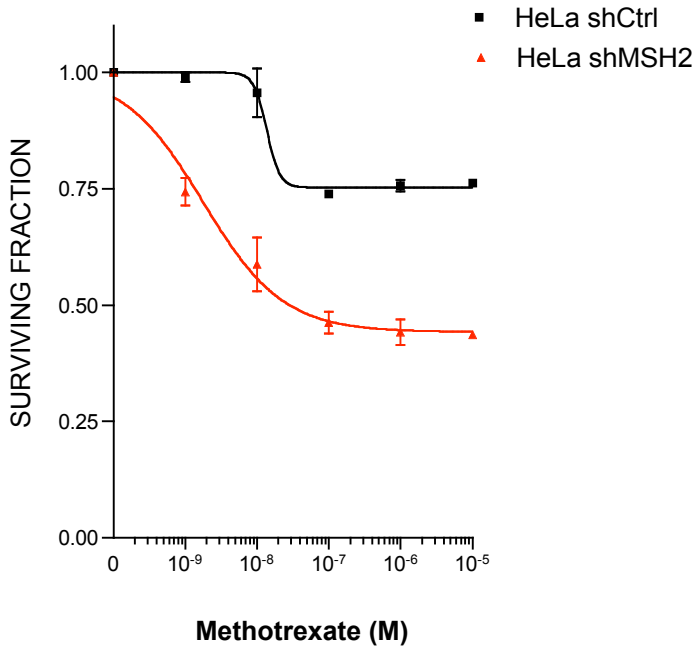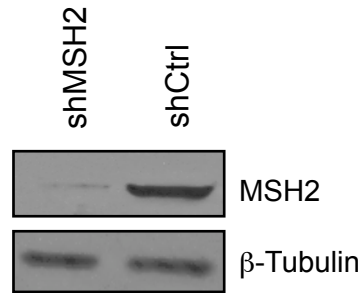

## B

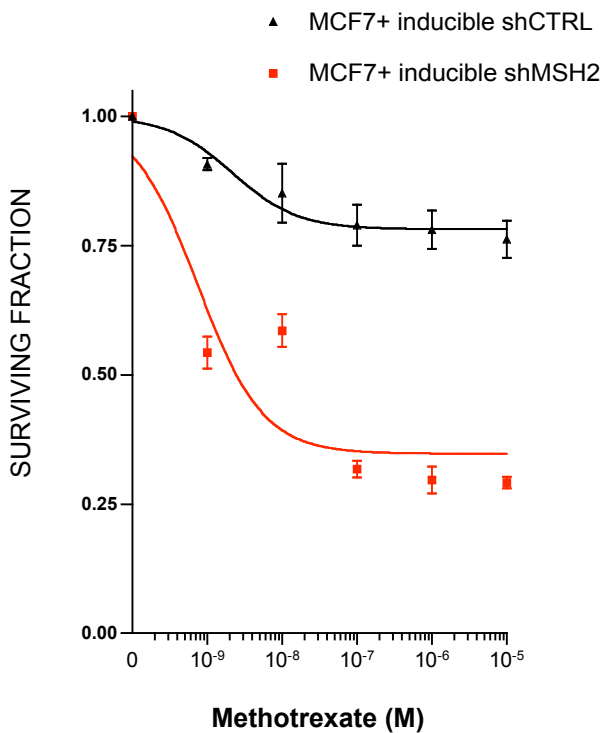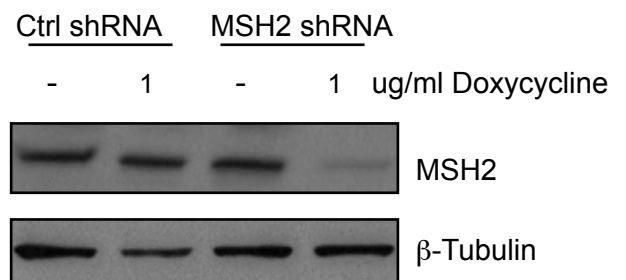

# SUPPLEMENTARY FIGURE 1

C

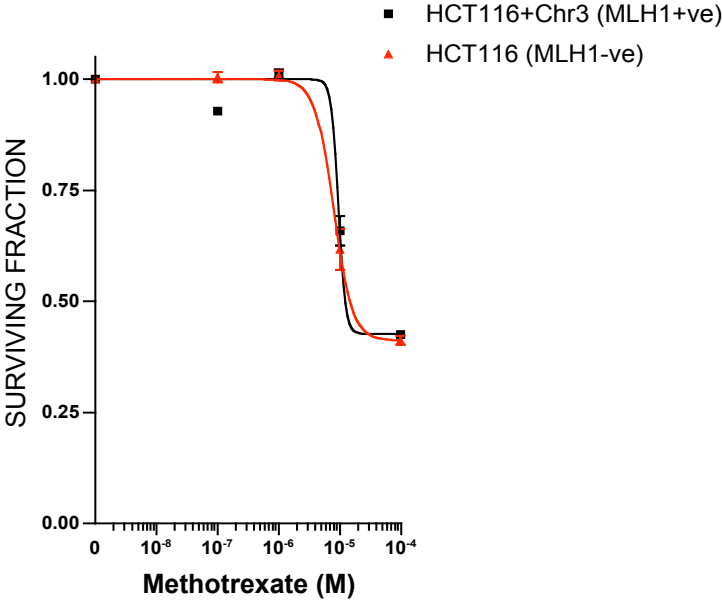

# SUPPLEMENTARY FIGURE 2

**A**

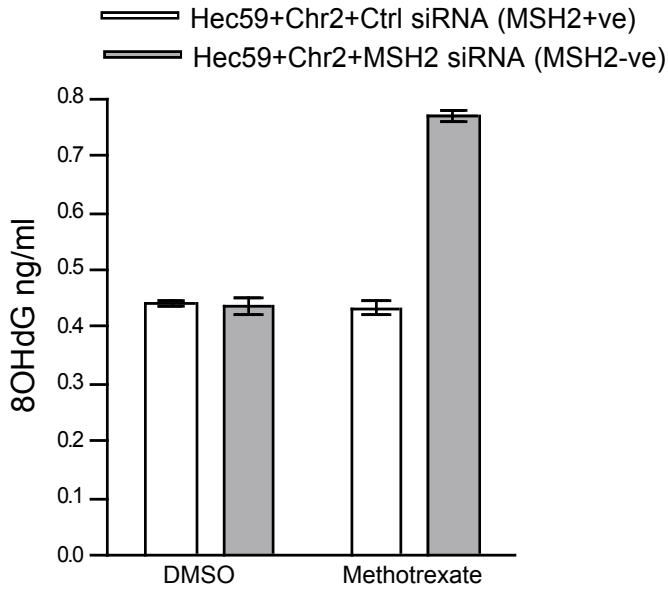

**B**

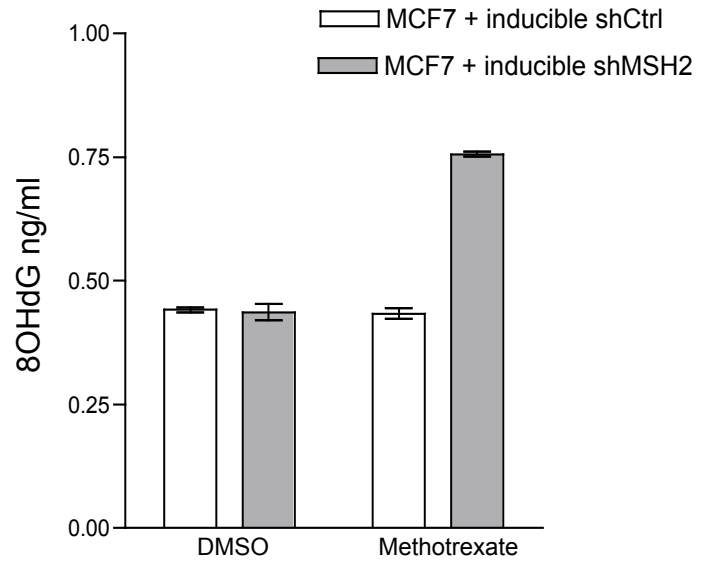

**C**

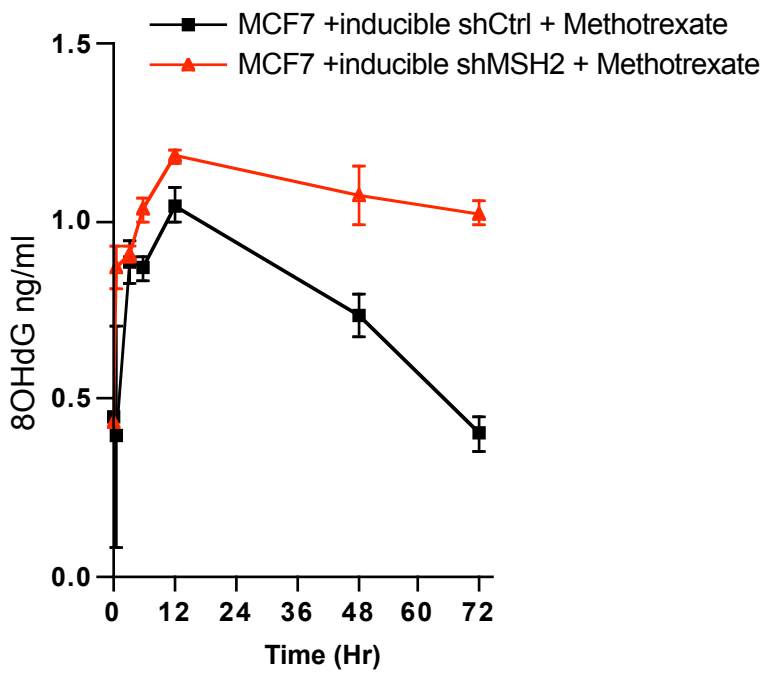

**D**

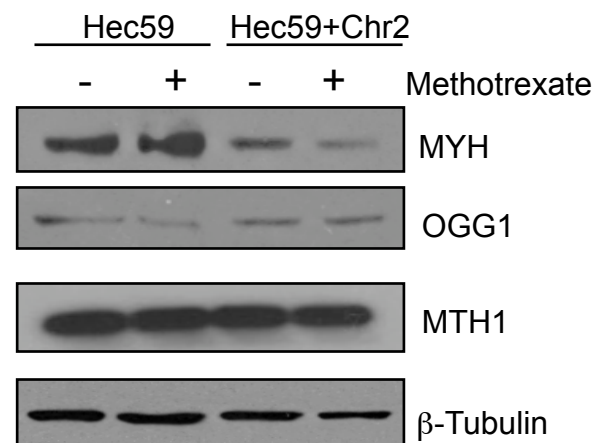

# SUPPLEMENTARY FIGURE 3

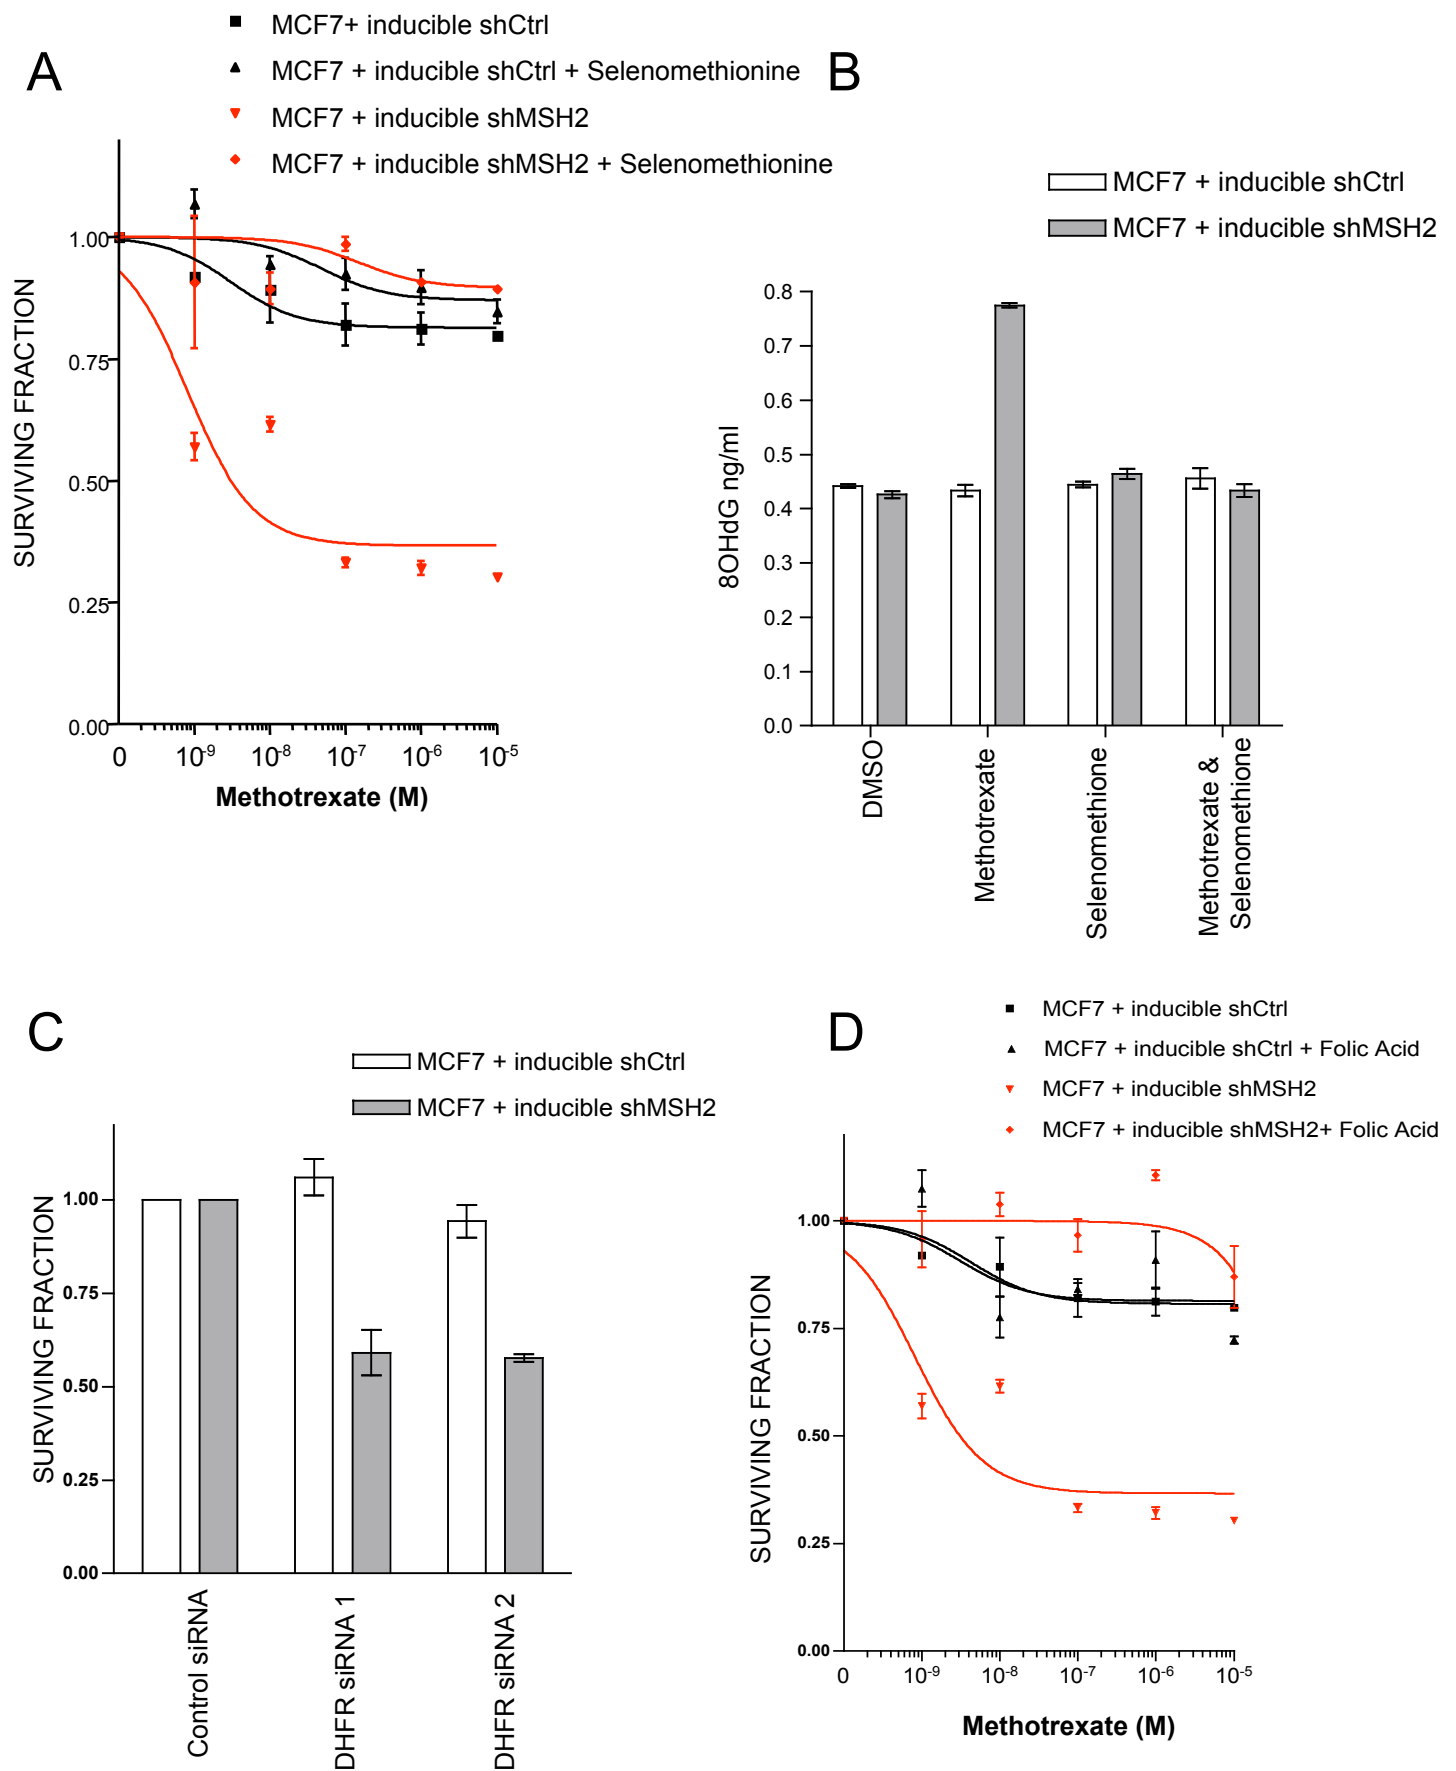



# SUPPLEMENTARY FIGURE 4

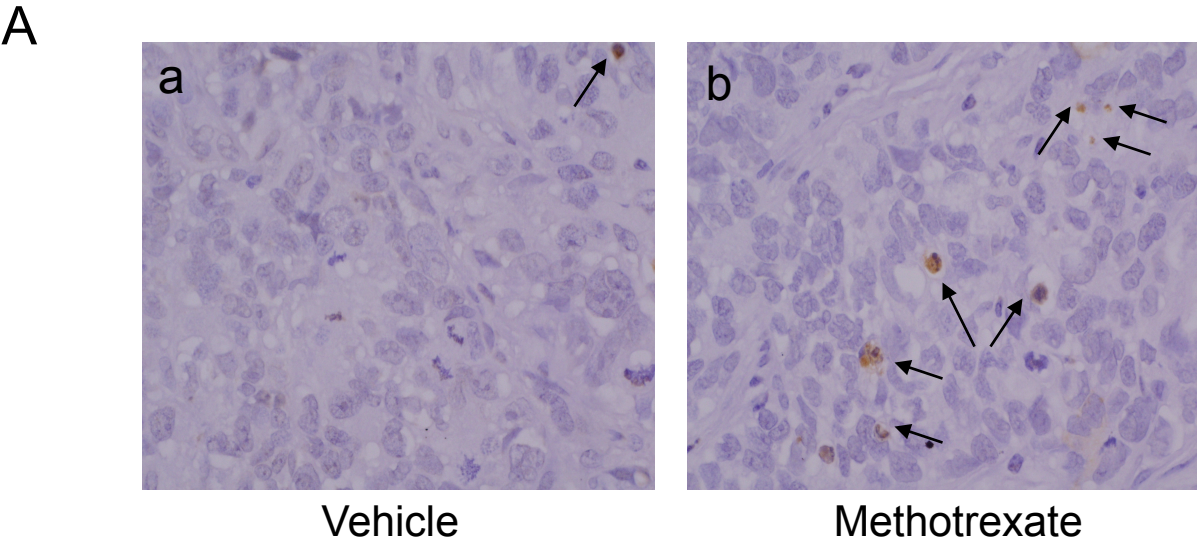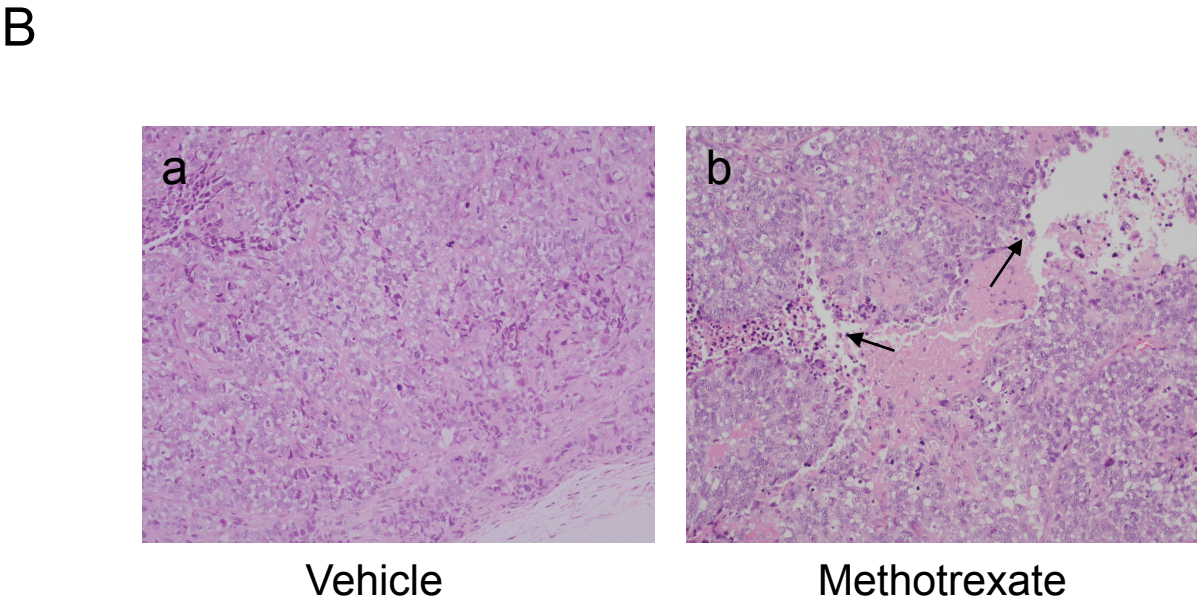

Supplement: emmm0001-0323-SD3.pdf [file emmm0001-0323-SD3.pdf]
